# Supplementary material for: Long-term outcomes of transsclerally sutured intraocular lens correctly fixed in the ciliary sulcus
Source: HighWire-hosted journal article supplement (doi:10.1136/bmjophth-2021-000935), 2022-04-01
Supplement: bmjophth-2021-000935supp003_data_supplement.pdf [file bmjophth-2021-000935supp003_data_supplement.pdf]

Supplemental Table S1. IOL decentration and tilt

|                                                                             | Decentration (mm) | Direction of decentration (°) | Tilt (°)  | Direction of tilt (°) |
|-----------------------------------------------------------------------------|-------------------|-------------------------------|-----------|-----------------------|
| Ciliary sulcus fixation cases (n=61)                                        | 0.430±0.168       | 200±117                       | 6.26±3.14 | 229±98                |
| Right eyes (n=33)                                                           | 0.457±0.146       | 242±93.8                      | 6.03±3.37 | 223±72.3              |
| Left eyes (n=28)                                                            | 0.398±0.187       | 149±121                       | 6.53±2.82 | 236±121               |
| Standard cataract surgery(n=54)                                             | 0.279±0.189       | 131±102                       | 4.77±2.01 | 222.9±97.8            |
| P value between Ciliary sulcus fixation cases and Standard cataract surgery | p<0.001           | p=0.006                       | p=0.002   | p=0.97                |
| P value between right eyes and left eyes of Ciliary sulcus fixation cases   | p=0.21            | p=0.004                       | p=0.28    | p=0.98                |

Data are mean ± standard deviation; IOL= intraocular lens  
Mann Whitney U test was used to compare Decentration and Tilt, and Welch's t test was used in those directions.

Supplemental Table S2. Comparison of transsclerally sutured reports with a postoperative observation period of 10 years or more

| Authors                                      | Vote et al                                                                                                                                                                   | Bading et al                                                                                                                                                                                                                                      | McAllister and Hirst                                                                                                                                                                   | Sugiura et al                                                                                                                                                                                           |
|----------------------------------------------|------------------------------------------------------------------------------------------------------------------------------------------------------------------------------|---------------------------------------------------------------------------------------------------------------------------------------------------------------------------------------------------------------------------------------------------|----------------------------------------------------------------------------------------------------------------------------------------------------------------------------------------|---------------------------------------------------------------------------------------------------------------------------------------------------------------------------------------------------------|
| Reference No.                                | 17                                                                                                                                                                           | 18                                                                                                                                                                                                                                                | 19                                                                                                                                                                                     | This report                                                                                                                                                                                             |
| Journal / Year                               | Am J Ophthalmol /2006                                                                                                                                                        | Am J Ophthalmol /2007                                                                                                                                                                                                                             | J Cataract Refract Surg /2011                                                                                                                                                          | 2022                                                                                                                                                                                                    |
| Observation period                           | 12mos~127mos                                                                                                                                                                 | 12mos~132mos                                                                                                                                                                                                                                      | 6.7mos~166.5mos                                                                                                                                                                        | 12mos~174mos                                                                                                                                                                                            |
| Mean observation period                      | 67.0 mos.                                                                                                                                                                    | 43.0 mos.                                                                                                                                                                                                                                         | 83.3 mos.                                                                                                                                                                              | 56.0 mos.                                                                                                                                                                                               |
| Number of cases                              | 61eyes of 48patients                                                                                                                                                         | 63eyes of 63patients                                                                                                                                                                                                                              | 82eyes of 72 patients                                                                                                                                                                  | 146 eyes of 142 patients                                                                                                                                                                                |
| Surgeon                                      | Several surgeons                                                                                                                                                             | More than 2 surgeons                                                                                                                                                                                                                              | 1 surgeon                                                                                                                                                                              | 1 surgeon                                                                                                                                                                                               |
| Technique                                    | Pars plana vitrectomy + ciliary sulcus suture fixation. The suture needle was inserted into the 1.5 mm sclera from limbus. The suture thread is buried in a triangular flap. | Pars plana vitrectomy + transsclerally suture fixation. The suture needle wad inserted into the 2 mm from the limbus.                                                                                                                             | Anterior vitrectomy + ciliary sulcus suture fixation. The suture thread is ligated into a 1 mm deep scleral half-layer straight incision.                                              | Ciliary sulcus suture fixation with the Ciliary Sulcus Pad Injector. Suture thread was confirmed to be correctly inserted into the ciliary sulcus by Endoscope.                                         |
| Major Preoperative ocular pathologies: ratio | Marfan:40%, Trauma:33%, Genetic disease: 8%                                                                                                                                  | Trauma:40%, Complicated cataract surgery:25%, Pseudoexfoliation:14%                                                                                                                                                                               | Complicated cataract surgery:26%, IOL disloacion:21%, Lens dislocaiton:24%, Trauma:19.5%                                                                                               | IOL dislocation:38.4%, Complicated cataract surgery:27.4%, Aphakia due to ECCE or ICCE:11%, Trauma:7.5%                                                                                                 |
| Preoperative CDVA / Postoperative final CDVA | LogMAR 0.5 → 0.5                                                                                                                                                             | LogMAR 1.025 → 0.766                                                                                                                                                                                                                              | Snellen 6/18 → 6/12                                                                                                                                                                    | LogMAR 0.30 → 0.15                                                                                                                                                                                      |
| Major postoperative complications: ratio     | Suture thread breakage: 28%, Retinal detachment: 8%, Elevated IOP: 22%, Glaucoma requiring surgery: 5%, Choroidal hemorrhage: 3%                                             | Elevated IOP: 30%, Retinal detachment: 9.5%, Iris capture: 8%, Choroidal bleeding requiring surgery: 6%, Vitreous hemorrhage requiring surgery: 5%, Wound suture failure: 6%, Suture thread breakage: 3.2%, Complications that affect vision: 19% | Elevated IOP: 30.5%, Exposed suture thread: 11%, Hysema:9.8%, CME: 7.3%, Suture thread breakage: 6.1%, Retinal detachment: 4.9%, Glaucoma requiring surgery:3.7%, Endophthalmitis:1.2% | Vitreous hemorrhage:24%, Exposed suture thread: 19.2%, Corectopia:18.5%, Glaucoma:11%, Iris capture:6.2%, Retinal detachmen:4.1%, Bullous keratitis:2.1%, Suture thread breakage and IOL dislocation:0% |
| Postoperative reoperation ratio              | 49.2%                                                                                                                                                                        | 40.0%                                                                                                                                                                                                                                             | 15.8%                                                                                                                                                                                  | 5.5%                                                                                                                                                                                                    |

|                        |                                                                                                                                                                                                  |                                                                                                                                                                                                      |                                                                                                                                                                                                                               |                                                                                                                                                                                                          |
|------------------------|--------------------------------------------------------------------------------------------------------------------------------------------------------------------------------------------------|------------------------------------------------------------------------------------------------------------------------------------------------------------------------------------------------------|-------------------------------------------------------------------------------------------------------------------------------------------------------------------------------------------------------------------------------|----------------------------------------------------------------------------------------------------------------------------------------------------------------------------------------------------------|
| Summary of conclusions | When observed in the long term after surgery, the incidence of complications is high and reoperation is necessary, so preoperative informed consent is important. ACIOL could be an alternative. | 20% have serious complications that require surgery, which depend on the preoperative pathological condition. Postoperative results are good, safer than ACIOL and recommended for younger patients. | Visual acuity results are good and complications are common. Rupture of the suture thread is a problem in young cases, and it is important to discuss it well in the informed consent when selecting an IOL (ACIOL or PCIOL). | Visual acuity results are very good for a long period of time, and there is no IOL dislocation due to suture thread breakage and endophthalmitis. It is a safe procedure recommended for young patients. |
|------------------------|--------------------------------------------------------------------------------------------------------------------------------------------------------------------------------------------------|------------------------------------------------------------------------------------------------------------------------------------------------------------------------------------------------------|-------------------------------------------------------------------------------------------------------------------------------------------------------------------------------------------------------------------------------|----------------------------------------------------------------------------------------------------------------------------------------------------------------------------------------------------------|

---

mos., months; IOL, intraocular lens; IOL, intraocular lens; CME, cystoid macula edema; ACIOL, anterior chamber IOL; PCIOL, posterior chamber IOL;
